# Supplementary material for: African signatures of recent positive selection in human FOXI1
Source: Springer Nature journal article supplement (doi:10.1186/1471-2148-10-267), 2010-09-01
Supplement: Additional file 1 [file 1471-2148-10-267-s1.pdf]

**Table S1.** Coriell repository numbers.

---

| Population  | Coriell repository numbers                                                                                                                                                                  |
|-------------|---------------------------------------------------------------------------------------------------------------------------------------------------------------------------------------------|
| Yoruban     | NA18501, NA18502, NA18507, NA18508, NA18855,<br>NA18856, NA18861, NA18862, NA19127, NA19128,<br>NA19137, NA19138, NA19171, NA19172, NA19203,<br>NA19204, NA19206, NA19207, NA19209, NA19210 |
| European    | NA06994, NA07000, NA07345, NA07357, NA11829,<br>NA11830, NA11839, NA11840, NA11992, NA11993,<br>NA12003, NA12004, NA12043, NA12044, NA12056,<br>NA12057, NA12750, NA12751, NA12812, NA12813 |
| Han Chinese | NA18576, NA18577, NA18579, NA18582, NA18593,<br>NA18623, NA18624, NA18632, NA18635, NA18636                                                                                                 |
| Japanese    | NA18940, NA18942, NA18943, NA18944, NA18948,<br>NA18949, NA18951, NA18956, NA18970, NA18973                                                                                                 |

---
