# Supplementary material for: African signatures of recent positive selection in human FOXI1
Source: Springer Nature journal article supplement (doi:10.1186/1471-2148-10-267), 2010-09-01
Supplement: Additional file 10 [file 1471-2148-10-267-s10.pdf]

**Table S4.** Functional characterization and allele frequencies for functionally relevant SNPs within ~ 140 kb containing the *FOXII* gene.

| SNP ID     | Position <sup>a</sup> | Alleles <sup>b</sup> | Africans        | Europeans       | Asians          | Sources                                    | Functional Effect <sup>d</sup>   |
|------------|-----------------------|----------------------|-----------------|-----------------|-----------------|--------------------------------------------|----------------------------------|
| rs6555882  | 169401666             | <b>G/C</b>           | 0.683           | 1               | 1               | HapMap-YRI, CEU, CHB, JPT                  | ESE ( <i>DOCK2</i> )             |
| rs17647491 | 169416284             | <b>C/T</b>           | 1               | 0.966           | 1               | HapMap-YRI, CEU, CHB, JPT                  | ESE ( <i>DOCK2</i> )             |
| rs13179480 | 169428747             | <b>A/C</b>           | 1               | 1               | 0.988           | HapMap-YRI, CEU, JPT                       | CNS, ESE ( <i>DOCK2</i> )        |
| rs13179490 | 169428777             | <b>A/C</b>           | 1               | 1               | 1               | HapMap-YRI, CEU, CHB, JPT                  | CNS ( <i>DOCK2</i> )             |
| rs2270900  | 169435654             | <b>T/C</b>           | 1               | 1               | 0.989           | HapMap-YRI, CEU, CHB, JPT                  | ESE ( <i>DOCK2</i> )             |
| rs1045168  | 169437321             | <b>T/C</b>           | 0.619           | 0.758           | 0.895           | HGDP-Yoruba, HapMap- CEU, JPT              | ESE ( <i>DOCK2</i> )             |
| rs2270898  | 169441471             | <b>T/A</b>           | 1               | 1               | 0.989           | HapMap-YRI, CEU, CHB, JPT                  | CNS, ESE ( <i>DOCK2</i> )        |
| rs1045176  | 169442598             | <b>G/T</b>           | 0.595           | 0.121           | 0.478           | HapMap-YRI, CEU, CHB                       | ESE ( <i>DOCK2</i> )             |
| rs9307     | 169442601             | <b>A/G</b>           | 0.080           | 0.361           | 0.330           | 1000 genomes (dbSNP)-YRI, CEU, CHB, JPT    | ESE ( <i>DOCK2</i> )             |
| rs17072089 | 169461251             | <b>C/G</b>           | 0.978           | 0.979           | 1               | Afr-Am, European, Asian (Perlegen)         | New TFBS ( <i>FOXII</i> )        |
| rs7704953  | 169461667             | <b>C/T</b>           | 0.929           | 0.583           | 0.818           | HGDP-Yor, HapMap- JPT, 1000 ge (dbSNP)-CEU | New TFBS ( <i>FOXII</i> )        |
| rs34218925 | 169465509             | <b>G/T</b>           | NA <sup>c</sup> | NA <sup>c</sup> | NA <sup>c</sup> |                                            | ESE ( <i>FOXII</i> )             |
| rs2277944  | 169465818             | <b>A/G</b>           | 0.714           | 0.188           | 0.479           | HGDP-Yor, European, Asian (Perlegen)       | ESE ( <i>FOXII</i> )             |
| rs35678180 | 169467782             | <b>G/A</b>           | 0.974           | NA <sup>c</sup> | NA <sup>c</sup> | Afr-Am (Applera)                           | ESE ( <i>FOXII</i> )             |
| rs10063424 | 169468100             | <b>T/C</b>           | 0.024           | 0.092           | 0.044           | HGDP-Yoruba, HapMap- CEU, CHB              | ESE ( <i>FOXII</i> )             |
| rs3828625  | 169468141             | <b>T/C</b>           | 1               | 1               | 0.988           | HGDP-Yoruba, HapMap- CEU, JPT              | CNS, ESE ( <i>FOXII</i> )        |
| rs6873124  | 169468312             | <b>A/C</b>           | 0.575           | 0.164           | 0.489           | HapMap-YRI, CEU, CHB                       | ESE ( <i>FOXII</i> )             |
| rs6555887  | 169468633             | <b>A/G</b>           | 0.847           | 0.908           | 0.978           | HapMap-YRI, CEU, JPT                       | ESS, ESE, miRNA ( <i>FOXII</i> ) |
| rs6555888  | 169468728             | <b>G/A</b>           | 0.842           | 0.808           | 0.944           | HapMap-YRI, CEU, JPT                       | miRNA ( <i>FOXII</i> )           |

<sup>a</sup>SNP positions are based on NCBI build 36.3, <sup>b</sup>Ancestral allele in bold, <sup>c</sup>Not available, <sup>d</sup>Functional effect as predicted by PupaSuite [40, 41]: ESE, exonic splicing enhancer; CNS, coding non-synonymous SNPs; TFBS, transcription factor binding sites; ESS, exonic splicing silencer; miRNA, microRNAs and their targets.
